# Supplementary material
Source: bioRxiv or medRxiv preprint supplement (https://www.biorxiv.org/content/biorxiv/early/2019/08/30/453928/DC1/embed/media-1.pdf)
Supplement: Supplementary file [file media-1.pdf]

## Supplementary Methods

**Zebrafish genomic DNA extraction:** Genomic DNA was extracted from fin-clips using QIAGEN DNeasy® Blood and Tissue Kit (Qiagen, Manchester, UK) according to manufacturer's instructions. Samples were eluted into distilled water and stored at -20°C until later use.

**Site Specific Polymerase Chain Reaction:** Allele-specific pcr single nucleotide polymorphism (SNP) assays were used for genotyping F3 individuals for mutations known to be present in the ENU-mutagenized F1 generation. Four primer pairs were designed to carry out pcr genotyping as previously described (61). The list of loss-of-function mutations in the AJBQM1 and AJBQM2 lines is detailed in Supplementary Table 1. For each line, a primer was designed with 3' complementary to the ENU-SNP with a second primer ~100bp downstream. The second pair had one primer with 3' complementary to the wild-type base with a second primer ~200bp upstream. The resulting pcr results in a 300bp fragment that spans the region and acts as an internal control for the pcr plus one 100bp fragment if homozygous for the mutation, 2 bands of 100bp and 200bp if heterozygous, and one 200bp fragment if homozygous wild-type. The 4-primer groups were designed with melting temperatures as close as possible using the NCBI primer design tool and were ordered from Eurofins, MWG operon (Ebersberg, DE).

**Supplementary Table 1:** List of loss-of-function mutations in the AJBQM1 (A) and AJBQM2 (B) lines. List was derived from exome sequencing and provided by the Wellcome Sanger Trust, Hinxton, Cambridge.

**A)**

26

| SNP Name                   | Allele Number | Location        | Description                                                              |
|----------------------------|---------------|-----------------|--------------------------------------------------------------------------|
| cacna1ba (Cacna1b)         | sa1562        | Zv9:5:31016641  | voltage-dependent N-type calcium channel subunit alpha-1B                |
| vcana (VCAN)               | sa1563        | Zv9:5:48057817  | novel protein similar to vertebrate chondroitin sulfate proteoglycan 2   |
| si:ch211-157f15.1 (EVPL)   | sa1564        | Zv9:6:21645941  | envoplakin                                                               |
| mobkl2a (MOBKL2A)          | sa1565        | Zv9:8:20954361  | mps one binder kinase activator-like 2A                                  |
| ENSDARG00000068026 (PRKG1) | sa1566        | Zv9:8:53199402  | protein kinase, cGMP-dependent, type I                                   |
| glis3 (GLIS3)              | sa1567        | Zv9:10:663606   | zinc finger protein GLIS3                                                |
| si:dkey-220f10.4 (TULP2)   | sa1568        | Zv9:12:21973687 | novel tub family member protein                                          |
| slit3 (SLIT3)              | sa1569        | Zv9:14:25591202 | slit homolog 3 protein                                                   |
| dchs1 (DCHS1)              | sa1570        | Zv9:15:31441900 | dachsous 1                                                               |
| flad1 (FLAD1)              | sa1571        | Zv9:16:25049338 | Molybdenum cofactor biosynthesis protein-like region FAD synthase region |
| si:ch211-199m3.2 (AKD1)    | sa1572        | Zv9:20:33741430 | adenylate kinase domain containing 1                                     |
| si:dkey-4c23.3 (???)       | sa1573        | Zv9:22:25367694 | novel protein similar to vitellogenin 1 (Vg1)                            |
| magi2 (MAGI2)              | sa1574        | Zv9:25:21478784 | membrane associated guanylate kinase, WW and PDZ domain containing 2     |
| zgc:101050 (TRIMM55)       | sa158         | Zv9:23:17631394 | hypothetical protein LOC445187 (tripartite motif-containing 55)          |

27 **B)**

| SNP Name                    | Allele Number | Location        | Description                                                          |
|-----------------------------|---------------|-----------------|----------------------------------------------------------------------|
| capn3 (CAPN3)               | sa150         | Zv9:17:45493087 | calpain-3                                                            |
| chrna9 (CHRNA9)             | sa975         | Zv9:1:22190803  | cholinergic receptor, nicotinic, alpha 9                             |
| snrnp70 (SNRNP70)           | sa976         | Zv9:3:32068963  | U1 small nuclear ribonucleoprotein 70 kDa                            |
| zgc:158677 (SV2B)           | sa977         | Zv9:7:16060160  | synaptic vesicle protein 2B homolog                                  |
| wu:fa96e12 (AC103686.1)     | sa978         | Zv9:7:44124381  | DNA-dependent protein kinase catalytic subunit                       |
| kctd4 (KCTD4)               | sa980         | Zv9:9:19495015  | potassium channel tetramerisation domain containing 4                |
| LOC557854 (SLC19A3)         | sa981         | Zv9:15:34443534 | solute carrier family 19, member 3                                   |
| tspan3a (TSPAN3)            | sa984         | Zv9:18:26858396 | tetraspanin 3                                                        |
| rapsn (RAPSN)               | sa985         | Zv9:18:20289900 | 43 kDa receptor-associated protein of the synapse                    |
| si:ch211-132b12.1 (SLC6A11) | sa986         | Zv9:18:38859333 | hypothetical protein LOC100034467                                    |
| pkhd1l1 (PKHD1L1)           | sa987         | Zv9:19:23349482 | polycystic kidney and hepatic disease 1 (autosomal recessive)-like 1 |
| klf11a (KLF-11)             | sa988         | Zv9:20:29529553 | kruppel-like factor 11a                                              |

28

29

30 **Supplementary Table 2.** Gene ID and primer sequences used in gene expression analysis.

| Gene name                   | Transcript ID                                       | Sequence (5' -> 3')                                                 | Fragment size (bp) |
|-----------------------------|-----------------------------------------------------|---------------------------------------------------------------------|--------------------|
| <i>Serotonergic pathway</i> |                                                     |                                                                     |                    |
| <i>Htr1aa</i>               | NM_001123321.1                                      | Forward: TTCTACATCCCGCTCATCCTCA<br>Reverse: CCTCCAAGTTTTACCCACCTCTC | 180                |
| <i>Htr1ab</i>               | NM_001145766.1                                      | Forward: AAACACCGAGGCGAAGAGGAA<br>Reverse: GGCAGCCAACACAGAATGAAAGT  | 99                 |
| <i>Htr2a</i>                | XM_684208.9                                         | Forward: TACGGTGGCTGGGAACATTTTAG<br>Reverse: GGGACACAGTGATGCAGGGAAA | 187                |
| <i>Htr5a</i>                | NM_001126410.2                                      | Forward: TGGATCAAAGAGGACCAACACC<br>Reverse: CTGAAACGTCACCGTGGCAT    | 118                |
| <i>Htr2cl1</i>              | NM_001129893.1                                      | Forward: AACTTCTTCCTCCGCTCACTCG<br>Reverse: ATGGCACACAGGTGCATGATGG  | 179                |
| <i>Htr2cl2</i>              | XM_001339004.7                                      | Forward: CACAACCCACCAACTTCTTCC<br>Reverse: ACGTCCAGAAAGATCCACAGCG   | 152                |
| <i>Htr4</i>                 | XM_021481160.1<br>XM_009291062.3                    | Forward: GTTTCTTTCCAAGCGCCTC<br>Reverse: ACTTCTTCCATCTCAGGCATC      | 168                |
| <i>Htr6</i>                 | XM_009297078.3                                      | Forward: ACTACAGTCATCAGGAGCCACC<br>Reverse: GCCAGGCACTGAAGAATAGTCC  | 147                |
| <i>Htr7</i>                 | XM_003199584.5                                      | Forward: TGGATGTGATGTGCTGTACCGC<br>Reverse: GCCATGCACTTTCCACTCTGTCT | 118                |
| <i>slc6a4/<br/>SERT</i>     | NM_001039972.1                                      | Forward: ACCAGGGGCGAAGCCAAGCA<br>Reverse: GCCACAGGCCCCCGCTGTTA      | 117                |
| <i>Htr1b</i>                | NM_001128709.1                                      | Forward: CCTTGTCGTCAGTTCTGGGT<br>Reverse: ATCAGAAAGTTCCGCCGGTGT     | 112                |
| <i>Nicotinic pathway</i>    |                                                     |                                                                     |                    |
| <i>Chrna2</i>               | NC_007128.7                                         | Forward: TGGCTGCAGATCAGTCAAAGAC<br>Reverse: CCCTCTAACTGTCCCTTCACAA  | 271                |
| <i>Chrna3</i>               | Not found in BLAST                                  | Forward: TGTACATCCGCCGATTACCGCT<br>Reverse: TCCGCAGTCGGAGGGCAGTA    | ?                  |
| <i>Chrna4b</i>              | ENSDART00000018614.7                                | Forward: TTACAAGAGGTTTGGGCGCT<br>Reverse: ACAGACCAGTAGATCATCACTCC   | 90                 |
| <i>Chrna5</i>               | NM_001017885.1                                      | Forward: GGCTCCCAGGTGACATTCTC<br>Reverse: AACCCCGGTTACCAGTGGCCT     | 103                |
| <i>Chrna6</i>               | NM_001042684                                        | Forward: AGGCTCTTTCGTCGTTTATTC<br>Reverse: TCTCAGCCAAAGGTTTGTTC     | 156                |
| <i>Chrna7</i>               | ENSDART00000171463.3<br>and<br>ENSDART00000166391.2 | Forward: ACCGTGTCACATTGTTCACTCTC<br>Reverse: ACAGGTCTCTCCAGTGGGTTA  | 105                |

|                             |                                                     |                                                                     |     |
|-----------------------------|-----------------------------------------------------|---------------------------------------------------------------------|-----|
| <i>Chrb2b</i>               | ENSDART00000041625.7<br>and<br>ENSDART00000185728.1 | Forward: CACAAAGTCACGCTCCGATAC<br>Reverse: CCGTCGCTCTGAGCAGATAA     | 160 |
| <i>Chrb3b</i>               | ENSDARG00000038508.5                                | Forward: CAGGAGTCAACCTCCGCTTT<br>Reverse: TGAATCTGAACGCACTGGCT      | 106 |
| <i>Chrb4</i>                | NC_007129.7                                         | Forward: ATGTGAATGAATGGCGGTGTGTG<br>Reverse: ATGCGCGTGTTCAGATTTACCC | 203 |
| <i>Dopaminergic pathway</i> |                                                     |                                                                     |     |
| <i>Drd1b</i>                | NM_001135976.2                                      | Forward: TGGTTCCTTTCTGCAACCCA<br>Reverse: AGTGATGAGTTCGCCCAACC      | 100 |
| <i>Drd2a</i>                | XM_009291617.3 and<br>XM_005157501.4                | Forward: TCCACAAAATCAGGAAAAGCGT<br>Reverse: CAGCCAATGTAAACCGGCAA    | 106 |
| <i>Drd3</i>                 | XM_021470111.1 and<br>XM_005162673.4                | Forward: ATCGAGTTTCGCAGAGCCTT<br>Reverse: TCCACAGTGTCTGAAAGCCG      | 95  |
| <i>Slc6a3</i>               | NM_131755.1                                         | Forward: GCCTGGTTTTACGGAGTGGA<br>Reverse: GGAGGATTGAAGGTGGCGAA      | 66  |
| <i>Adrenergic pathway</i>   |                                                     |                                                                     |     |
| <i>Adra1aa</i>              | NM_001324454.1                                      | Forward: AAGAAGGCCGCAAGACTTT<br>Reverse: GTCCGAGGGTCTGTACGTTG       | 114 |
| <i>Adra1d</i>               | XM_691951.6                                         | Forward: AAGCTGCTAAAACCCTCGCC<br>Reverse: GGCTTCAGAGCTGGGAAGAAT     | 103 |
| <i>Adra2b</i>               | NM_207638.1                                         | Forward: AAAAGCCAGGCCTCCTCAACTT<br>Reverse: GGGCTTGCAGAAGGTTGTTG    | 92  |
| <i>Adra2c</i>               | NM_207639.1                                         | Forward: CGCCGTTTTAACGAGCAGAG<br>Reverse: AGTGTGGCCACCAGAATGTC      | 87  |
| <i>Adra2da</i>              | NM_194364.2                                         | Forward: CATCATCCTCGTGGTGTCCC<br>Reverse: ATCCCATGATCTCGTTGGCG      | 188 |
| <i>Adra2db</i>              | NM_194365.1                                         | Forward: TGCCACTTTGGTCATTCCGT<br>Reverse: AGCCAGGTAGAAAGCACACC      | 88  |

31

32

33 **Supplementary Table 3: Sample characteristics of the human cohorts.** Detailed inclusion  
 34 and exclusion criteria for the London cohorts can be found in <https://clinicaltrials.gov>.  
 35 Further details about recruitment and definition of medical phenotypes can be found  
 36 elsewhere (69–71). \*\*Differences in sample size for Finnish cohorts was due to hard-call  
 37 genotype probability threshold. DSM-IV nicotine dependence symptoms, Fagerström scores  
 38 and cigarettes smoked each day (N = 1715). Sensation felt after smoking first cigarette (N =  
 39 1915). Time to first cigarette in the morning (N= 1726).

| <i>Cohort name</i> | <i>N</i>          | <i>Country</i> | <i>Cohort description</i>                                                                                                                         | <i>ClinicalTrials.gov ID</i> | <i>Mean age (years)</i> | <i>% female</i> | <i>Smoking phenotypes investigated</i>                                                                                 | <i>N heavy smokers</i> |
|--------------------|-------------------|----------------|---------------------------------------------------------------------------------------------------------------------------------------------------|------------------------------|-------------------------|-----------------|------------------------------------------------------------------------------------------------------------------------|------------------------|
| ViDiCO             | 272               | UK             | Subjects with mild, moderate or severe chronic obstructive pulmonary disease (COPD) treated with the same bi-monthly 3mg vitamin D3 intervention. | NCT00977873                  | 64.6                    | 40              | Tobacco consumption; smoking cessation (current vs ever smokers)                                                       | 249                    |
| ViDiAs             | 293               | UK             | Adult patients with asthma treated with inhaled corticosteroids treated with a bi-monthly 3mg vitamin D3 intervention                             | NCT00978315                  | 47                      | 56              | Tobacco consumption; smoking cessation (current vs ever smokers)                                                       | 17                     |
| ViDiFLU            | 298               | UK             | Adults in sheltered accommodation given 10 mcg vitamin D3 daily as well as bi-monthly 3mg vitamin D3 interventions                                | NCT01069874                  | 66.8                    | 66              | Tobacco consumption; smoking cessation (current vs ever smokers)                                                       | 66                     |
| Finnish Twins      | 1915, 1715, 1726* | Finland        | Study sample ascertained from the Finnish Twin Cohort study (N=35834 adult twins) concordant for moderate to heavy smoking                        | NA                           | 55                      | 48              | DSM-IV nicotine dependence symptoms; Fagerström scores; cigarettes smoked each day; sensation felt after smoking first | NA                     |

40 **Phenotype definitions for the London cohorts:** *Amount smoked* was defined as the average  
41 number of cigarettes smoked per day (CPD) for each participant. Participants met criteria for  
42 *smoking cessation* if they reported being ‘ever smokers’ and reported **not** smoking currently.  
43 The percentage of current smokers in the cohort was 42%, 7% and 18% for ViDiCO, ViDiAs  
44 and ViDiFLU, respectively.

45

46 **Phenotype definition for the Finnish twin cohort study:** Definitions of the phenotypes  
47 were adapted from Broms et al (74).

48

49 *Amount smoked*

50 Cigarettes per day (CPD) constitutes of eight categories: 1-2, 3-5, 6-10, 11-15, 16-19, 20-25,  
51 26-39,  $\geq 40$  CPD. In the statistical analyses of the CPD variables, original categorical  
52 observations were replaced with class means of CPD (1.5, 3.5, 8, 13, 17.5, 22.5, 32.5, and 45  
53 cigarettes per day, respectively). Regression coefficients can therefore be interpreted as the  
54 average change in number of cigarettes smoked per day when the number of minor allele is  
55 increased by one.

- 56
- **CPD:** Number of cigarettes smoked per day during month of heaviest smoking.  
57 Values ranged from 1 to >40 with mean=19.8 cigarettes per day.
  - **Maximum CPD:** Maximum number of cigarettes ever smoked during one day (24h  
58 period). Values ranged from 2 to 98 with mean=30 cigarettes per day.  
59

60

61 *Smoking initiation*

- 62 • **Age of onset of weekly smoking:** Age (years) when started to smoke weekly (“How  
63 old were you when you first smoked a cigarette at least once a week for at least two  
64 months in a row?”). Values ranged from 6 to 54, mean=17.3 years.
- 65 • **First time sensation.** Sensation felt after smoking the first cigarette or first puffs.  
66 Sensation measured as: ”While smoking your very first cigarettes, did you (1) like the  
67 taste or smell of the cigarette, (2) cough, (3) feel dizzy or light-headed, (4) feel more  
68 relaxed, (5) get a headache, (6) feel a pleasurable rush or buzz, (7) feel your heart  
69 racing, (8) feel nauseated, like vomiting, (9) feel your muscles tremble or become  
70 jittery, (10) feel burning in your throat”). Sum score of 10 questions (items #1, #4,  
71 and #6 were reverse-scored before summation): 0 points if answered “No”, 1 = ”A  
72 little bit”, 2=”Some”, 3= ”Quite a bit”, 4=”A great deal”. Cronbach’s alpha = 0.70.  
73 Values ranged from 3.6 to 15.8. Mean =10.2.

74

75 Nicotine dependence

- 76 • **DSM-IV ND diagnosis:** Nicotine dependence by DSM-IV diagnosis ( $\geq 3$  symptoms  
77 out of 7 occurring within a year). Prevalence = 53.5%.
- 78 • **DSM-IV ND symptoms:** Number of DSM-IV ND symptoms from 0 to 7. Mean=3
- 79 • **FTND ( $\geq 4$ ):** Nicotine dependent if  $\geq 4$  out of 10 points in Fagerström Test for  
80 Nicotine Dependence. Prevalence = 50.4%
- 81 • **FTND score:** Fagerström Test for Nicotine Dependence (FTND) score: 0 to 10  
82 points. Mean=3.7.
- 83 • **FTND time to first cigarette (TTF):** Time to first cigarette in the morning (one item  
84 of the FTND scale). Five categories: 0-5 min, 6-15 min, 16-30 min, 31-60 min,  
85 >60 min. Categorization differs from original four categories (3), i.e., 6-30 minutes is  
86 split into 6-15 min and 16-30 min. In our data set 46% of smokers belong to the group

87 of 6-30 min, and from the smoking behaviour point of view there is a significant  
88 difference whether one smokes the first cigarette within 6 minutes or 30 minutes from  
89 waking up. In this data set 22% of smokers belong to the 6-15 min and 24% to the 16-  
90 30 min group. Values ranged from 1 to 5 with a mean=3.1.



1 **Supplementary Table 4.** Primer and reporter sequences used for human genotyping.

| <b>GENE</b>   | <b>SNP</b> | <b>Sequence name</b> | <b>Sequence</b>                          |
|---------------|------------|----------------------|------------------------------------------|
| <i>CYP3A4</i> | rs2740574  | Forward              | CCAGGCATAGGTAAAGATCTGTAGGT               |
|               |            | Reverse              | CTCAAGTGGAGCCATTGGCATA                   |
|               |            | Reporters            | ACAAGGGCAAGAGAG and<br>ACAAGGGCAGGAGAG   |
|               |            |                      |                                          |
| <i>CUBN</i>   | rs3740165  | Forward              | GCAATGAGATTAATCTTCAGGAAACACA             |
|               |            | Reverse              | CTGGAGGTATAGGAAGCAGTGAAG                 |
|               |            | Reporters            | CCGCCATATGGCCTG and CGCCATACGGCCTG       |
|               |            |                      |                                          |
| <i>RXRA</i>   | rs7861779  | Forward              | TGGCCCATGCACGAGTAG                       |
|               |            | Reverse              | ACCGAGACAGGCCAAACTC                      |
|               |            | Reporters            | CAGCAGAGGTGGCCGA and<br>CAGCAGAGATGGCCGA |
|               |            |                      |                                          |

2

3

4  
5

**Supplementary results**

6 **Supplementary Table 5: Site specific pcr genotyping of AJBQM1 (A) and AJBQM2 (B)**  
 7 **outlier siblings.** The siblings were genotyped at each of the candidate loci using site specific  
 8 pcr and results compared with each individual place preference change scores. P-values result  
 9 from independent two-sample t-tests comparing preference change scores between wildtype  
 10 and subjects with a copy of mutant allele at each locus.

11 **(A)**

| Gene name      | CPP Change Score |      |      |      |      |      |      |      |      |     | P-value                 |
|----------------|------------------|------|------|------|------|------|------|------|------|-----|-------------------------|
|                | 0                | 0.01 | 0.07 | 0.15 | 0.32 | 0.43 | 0.44 | 0.47 | 0.51 | 0.6 |                         |
| <i>Slit3</i>   | WT               | WT   | WT   | WT   | HET  | HET  | HET  | HET  | HET  | HET | 7.6592x10 <sup>-5</sup> |
| <i>Cacne</i>   | WT               | HET  | WT   | WT   | HOM  | HET  | WT   | WT   | WT   | WT  | 0.691                   |
| <i>Vcan</i>    | HET              | HET  | WT   | HET  | HOM  | WT   | HET  | HET  | WT   | WT  | 0.259                   |
| <i>Evpl</i>    | WT               | WT   | WT   | WT   | WT   | WT   | WT   | WT   | WT   | WT  | -                       |
| <i>Mob3a</i>   | HET              | HET  | HET  | HOM  | HOM  | HET  | WT   | HET  | WT   | HET | 0.236                   |
| <i>Prkg1</i>   | HET              | HET  | HET  | HET  | HET  | HET  | HET  | HET  | HOM  | HOM | -                       |
| <i>Glis3</i>   | WT               | HET  | HET  | HET  | WT   | WT   | WT   | HET  | WT   | HET | 0.602                   |
| <i>Tulp2</i>   | HOM              | HOM  | WT   | HET  | WT   | HET  | HET  | HET  | WT   | WT  | 0.481                   |
| <i>Dchs1</i>   | WT               | WT   | WT   | WT   | WT   | WT   | WT   | WT   | WT   | WT  | -                       |
| <i>Flad1</i>   | HOM              | HOM  | WT   | HET  | WT   | WT   | WT   | HET  | HET  | HET | 0.981                   |
| <i>Akd1</i>    | HOM              | HOM  | WT   | HET  | WT   | HET  | HET  | HET  | WT   | WT  | 0.418                   |
| <i>MagI2</i>   | HET              | WT   | HET  | WT   | HET  | HOM  | WT   | WT   | HOM  | HET | 0.73                    |
| <i>Trimm55</i> | WT               | HET  | WT   | HET  | WT   | WT   | WT   | WT   | HET  | WT  | 0.51                    |

12

13 (B)

| Gene name         | CPP Change Score |       |       |       |       |       |       |       |       |       |       |       |      |      | P-value |
|-------------------|------------------|-------|-------|-------|-------|-------|-------|-------|-------|-------|-------|-------|------|------|---------|
|                   | -0.38            | -0.28 | -0.27 | -0.23 | -0.21 | -0.18 | -0.17 | -0.17 | -0.12 | -0.09 | -0.09 | -0.07 | 0.04 | 0.07 |         |
| <i>Tspan3a</i>    | HET              | HET   | HET   | WT    | WT    | WT    | HET   | HET   | WT    | WT    | WT    | HET   | HET  | HET  | 0.583   |
| <i>Raspn</i>      | WT               | HOM   | WT    | WT    | WT    | HOM   | HOM   | HOM   | WT    | WT    | WT    | HOM   | WT   | HOM  | 0.792   |
| <i>A9</i>         | WT               | WT    | HET   | WT    | WT    | WT    | HET   | WT    | HET   | HET   | HET   | HET   | HET  | HET  | 0.339   |
| <i>Capn3</i>      | HET              | HET   | HET   | WT    | HET   | WT    | WT    | HET   | WT    | HET   | WT    | WT    | WT   | WT   | 0.911   |
| <i>Klf11a</i>     | WT               | WT    | WT    | HET   | WT    | WT    | WT    | HET   | WT    | WT    | HET   | WT    | HET  | WT   | 0.318   |
| <i>Kctd4</i>      | HET              | WT    | WT    | HET   | WT    | WT    | HET   | WT    | HET   | HET   | HET   | HET   | WT   | WT   | 0.252   |
| <i>Slc6a11</i>    | HET              | HET   | HET   | WT    | HET   | WT    | HET   | HET   | WT    | WT    | WT    | WT    | HET  | WT   | 0.697   |
| <i>Pkhd11l</i>    | WT               | WT    | WT    | HET   | HOM   | HOM   | HET   | WT    | WT    | WT    | WT    | WT    | WT   | HOM  | 0.499   |
| <i>Slc19a3</i>    | WT               | WT    | WT    | WT    | WT    | WT    | WT    | WT    | WT    | WT    | WT    | WT    | WT   | WT   | -       |
| <i>Sv2b</i>       | WT               | WT    | HET   | WT    | WT    | WT    | WT    | HET   | HOM   | HET   | HOM   | HOM   | HET  | HOM  | 0.269   |
| <i>Snrnp70</i>    | WT               | WT    | WT    | WT    | WT    | WT    | WT    | WT    | WT    | WT    | WT    | WT    | WT   | WT   | -       |
| <i>Ac10103686</i> | WT               | WT    | WT    | WT    | WT    | WT    | WT    | WT    | WT    | WT    | WT    | WT    | WT   | WT   | -       |

14

15

16 **Supplementary Table 6:** Results of association analysis of *SLIT3* SNPs on **smoking**  
 17 **initiation.** Logistic regression of initiation vs non-initiation on additive genotype, controlling  
 18 for age, sex and cohort. OR: Odds ratio. >1 value indicates that the minor allele increases  
 19 odds of persistent smoking relative to the major allele, SE: standard error, L95: lower limit of  
 20 95% confidence interval, U95: upper limit of 95% confidence interval. Benjamini Hochberg  
 21 cut off at  $0.1 = 0.00526$ .

| <b>SNP</b>    | <b>OR</b> | <b>SE</b> | <b>L95</b> | <b>U95</b> | <b>P value</b> |
|---------------|-----------|-----------|------------|------------|----------------|
| rs2938774     | 0.7253    | 0.1418    | 0.5493     | 0.9578     | 0.02357        |
| rs11742567    | 1.328     | 0.1538    | 0.9825     | 1.796      | 0.06496        |
| rs4282339     | 0.7277    | 0.1815    | 0.5099     | 1.039      | 0.07991        |
| rs297886      | 1.328     | 0.176     | 0.9405     | 1.875      | 0.1071         |
| rs9688032     | 1.269     | 0.1495    | 0.9467     | 1.701      | 0.111          |
| rs7728604     | 1.198     | 0.1446    | 0.9024     | 1.591      | 0.2112         |
| rs1345588     | 0.7788    | 0.2046    | 0.5215     | 1.163      | 0.2218         |
| rs17734503    | 0.7362    | 0.2632    | 0.4395     | 1.233      | 0.2445         |
| rs12515725    | 0.8612    | 0.1458    | 0.6471     | 1.146      | 0.3052         |
| rs11749001    | 0.8698    | 0.1951    | 0.5933     | 1.275      | 0.4746         |
| rs3733975     | 1.116     | 0.1641    | 0.8092     | 1.54       | 0.5029         |
| rs12521041    | 1.116     | 0.1641    | 0.8092     | 1.54       | 0.5029         |
| rs11134527    | 0.9212    | 0.155     | 0.6798     | 1.248      | 0.5964         |
| rs12654448    | 0.8718    | 0.2654    | 0.5182     | 1.467      | 0.6052         |
| rs1559051     | 0.9257    | 0.1575    | 0.6799     | 1.26       | 0.6241         |
| rs17665158    | 0.9304    | 0.171     | 0.6654     | 1.301      | 0.673          |
| rs1421763     | 0.9423    | 0.1704    | 0.6748     | 1.316      | 0.7271         |
| rs295994      | 0.9732    | 0.1404    | 0.7391     | 1.281      | 0.8464         |
| 22 rs10036727 | 1.01      | 0.1522    | 0.7491     | 1.361      | 0.9503         |

23

24 **Supplementary Table 7:** Results of association analysis of *SLIT3* SNPs on **persistent**  
 25 **smoking.** Logistic regression of initiation vs non-initiation on additive genotype, controlling  
 26 for age, sex and cohort. OR: Odds ratio. >1 value indicates that the minor allele increases  
 27 odds of persistent smoking relative to the major allele, SE: standard error, L95: lower limit of  
 28 95% confidence interval, U95: upper limit of 95% confidence interval. Benjamini Hochberg  
 29 cut off at  $0.1 = 0.00526$ .

30

| <b>SNP</b>    | <b>OR</b> | <b>SE</b> | <b>L95</b> | <b>U95</b> | <b>P value</b> |
|---------------|-----------|-----------|------------|------------|----------------|
| rs11134527    | 1.428     | 0.1573    | 1.049      | 1.943      | 0.02359        |
| rs12521041    | 0.6871    | 0.1736    | 0.489      | 0.9655     | 0.03061        |
| rs11742567    | 0.7288    | 0.1547    | 0.5382     | 0.987      | 0.04089        |
| rs3733975     | 0.7165    | 0.1712    | 0.5123     | 1.002      | 0.05146        |
| rs17734503    | 0.6142    | 0.2631    | 0.3667     | 1.029      | 0.06398        |
| rs1345588     | 0.6786    | 0.2145    | 0.4457     | 1.033      | 0.07068        |
| rs17665158    | 1.338     | 0.163     | 0.9722     | 1.842      | 0.07393        |
| rs12654448    | 0.6225    | 0.2671    | 0.3688     | 1.051      | 0.07597        |
| rs2938774     | 1.232     | 0.1394    | 0.9373     | 1.619      | 0.1348         |
| rs295994      | 1.214     | 0.1443    | 0.9147     | 1.61       | 0.1796         |
| rs7728604     | 1.152     | 0.1434    | 0.8699     | 1.526      | 0.3232         |
| rs1559051     | 1.115     | 0.1549    | 0.8231     | 1.511      | 0.4821         |
| rs12515725    | 0.9108    | 0.1456    | 0.6846     | 1.212      | 0.521          |
| rs297886      | 0.9342    | 0.1726    | 0.6661     | 1.31       | 0.6932         |
| rs4282339     | 0.9391    | 0.19      | 0.6471     | 1.363      | 0.7411         |
| rs10036727    | 0.9596    | 0.1516    | 0.713      | 1.292      | 0.7857         |
| rs1421763     | 1.029     | 0.1671    | 0.7417     | 1.428      | 0.8633         |
| rs9688032     | 1.013     | 0.1511    | 0.7531     | 1.362      | 0.9328         |
| 31 rs11749001 | 0.9943    | 0.1969    | 0.676      | 1.463      | 0.977          |

32

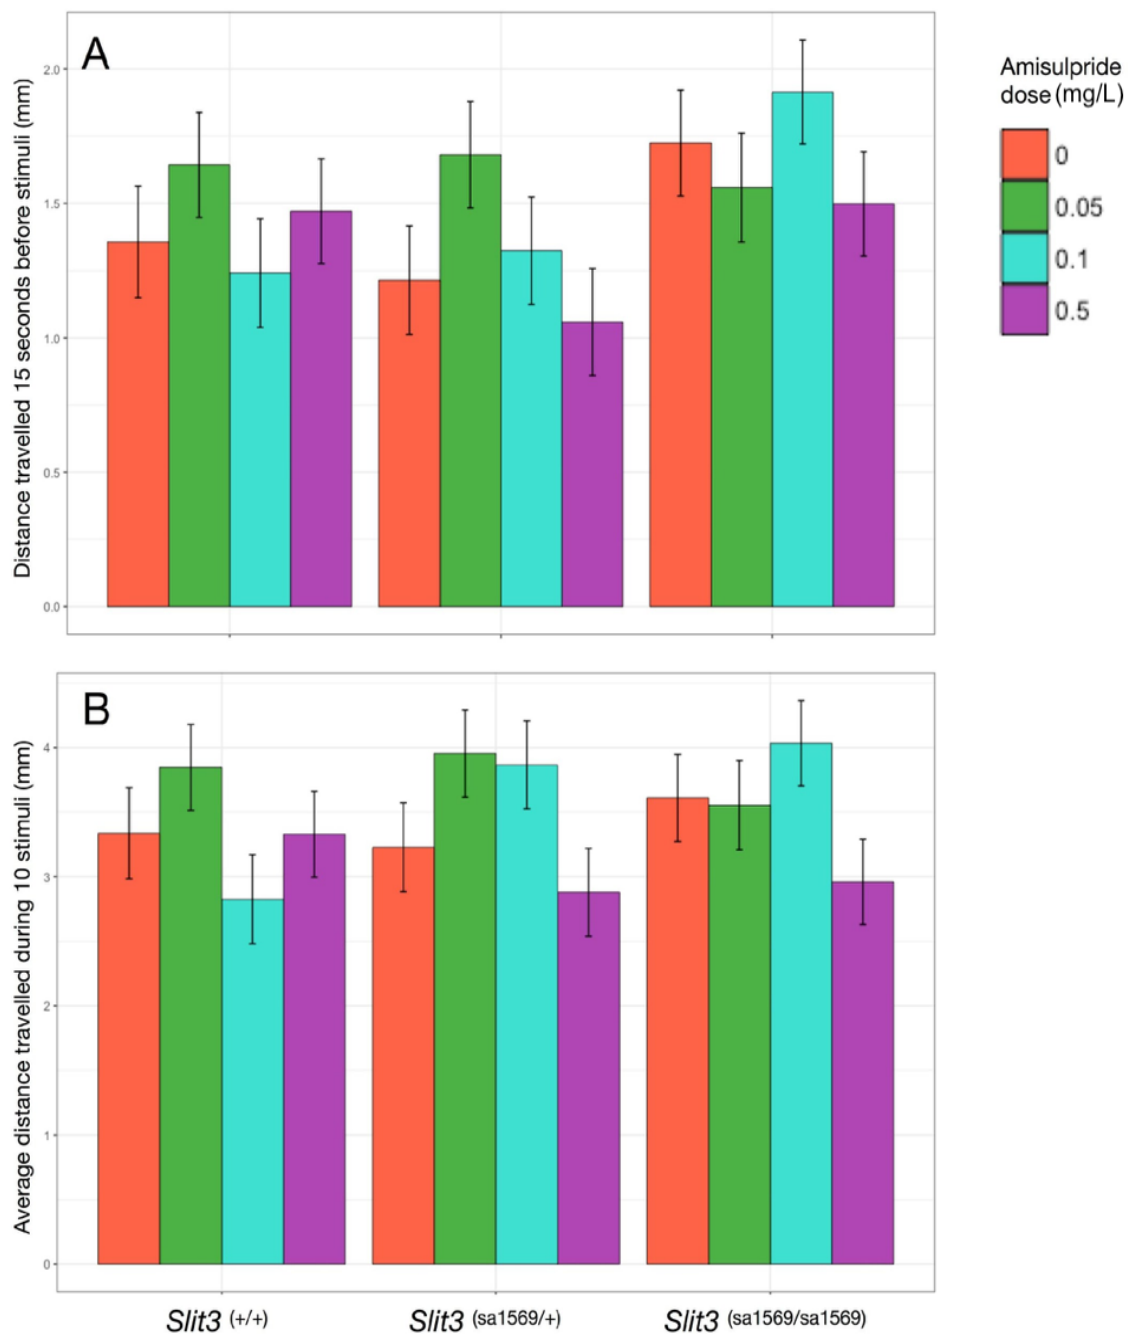

33

34 **Supplementary Figure 1.** Average distance moved before (Figure 1A) and during startle

35 stimuli (Figure 1B) in wildtype and *Slit3*<sup>sa1569</sup> mutant five day old zebrafish larvae. **A)**

36 Distance moved as function of amisulpride dose, fish *Slit3* genotype and their interaction.

37 The effect of dose and genotype was tested in a linear mixed model. Timepoint, well where

38 the fish were placed and plate were also included as fixed factors and the fish ID as random

39 factor. **B)** Distance moved during taps as function of amisulpride dose and fish *Slit3*

40 genotype. Drug and genotype effects were examined in a linear mixed model including  
41 stimulus number, well, plate used and distance moved before stimuli as fixed factors and Fish  
42 ID as random factor. Zebrafish larvae did not differ in the distance travelled before or during  
43 startle stimuli as a function of amisulpride dose nor genotype ( $p > 0.05$ ). Bars represent  
44 estimated marginal means  $\pm$  SEM (n=42-48 fish per group).

45

46

### Supplementary references

47

- 48 1. World Health Organization, Bloomberg Philanthropies. WHO report on the global  
49 tobacco epidemic, 2017: monitoring tobacco use and prevention policies. 2017.
- 50 2. National Center for Chronic Disease Prevention and Health Promotion (US) Office on  
51 Smoking and Health. The Health Consequences of Smoking—50 Years of Progress: A  
52 Report of the Surgeon General [Internet]. Atlanta (GA): Centers for Disease Control and  
53 Prevention (US); 2014 [cited 2018 Jul 20]. (Reports of the Surgeon General). Available  
54 from: <http://www.ncbi.nlm.nih.gov/books/NBK179276/>
- 55 3. Xu X, Bishop EE, Kennedy SM, Simpson SA, Pechacek TF. Annual healthcare  
56 spending attributable to cigarette smoking: an update. *Am J Prev Med.* 2015  
57 Mar;48(3):326–33.
- 58 4. Munafò M, Clark T, Johnstone E, Murphy M, Walton R. The genetic basis for smoking  
59 behavior: a systematic review and meta-analysis. *Nicotine Tob Res.* 2004  
60 Aug;6(4):583–97.
- 61 5. Batra V, Patkar AA, Berrettini WH, Weinstein SP, Leone FT. The genetic determinants  
62 of smoking. *Chest.* 2003 May;123(5):1730–9.
- 63 6. Liu M, Jiang Y, Wedow R, Li Y, Brazel DM, Chen F, et al. Association studies of up to  
64 1.2 million individuals yield new insights into the genetic etiology of tobacco and  
65 alcohol use. *Nat Genet.* 2019 Jan 14;
- 66 7. Erzurumluoglu AM, Liu M, Jackson VE, Barnes DR, Datta G, Melbourne CA, et al.  
67 Meta-analysis of up to 622,409 individuals identifies 40 novel smoking behaviour  
68 associated genetic loci. *Mol Psychiatry.* 2019 Jan 7;
- 69 8. Darland T, Dowling JE. Behavioral screening for cocaine sensitivity in mutagenized  
70 zebrafish. *Proc Natl Acad Sci USA.* 2001 Sep 25;98(20):11691–6.
- 71 9. Brennan CH, Parker MO. Zebrafish (*Danio rerio*) models of substance abuse:  
72 Harnessing the capabilities. *Behaviour.* 2012;149(10–12):1037–62.
- 73 10. Engleman EA, Katner SN, Neal-Beliveau BS. *Caenorhabditis elegans* as a Model to  
74 Study the Molecular and Genetic Mechanisms of Drug Addiction. *Prog Mol Biol Transl*  
75 *Sci.* 2016;137:229–52.
- 76 11. Shipley AT, Imeh-Nathaniel A, Orfanakos VB, Wormack LN, Huber R, Nathaniel TI.  
77 The Sensitivity of the Crayfish Reward System to Mammalian Drugs of Abuse. *Front*  
78 *Physiol* [Internet]. 2017 [cited 2019 Jul 29];8. Available from:  
79 <https://www.frontiersin.org/articles/10.3389/fphys.2017.01007/full>
- 80 12. Berridge KC, Kringelbach ML. Affective neuroscience of pleasure: reward in humans  
81 and animals. *Psychopharmacology (Berl).* 2008 Aug;199(3):457–80.



- 82 13. Tzschentke TM. Measuring reward with the conditioned place preference paradigm: a  
83 comprehensive review of drug effects, recent progress and new issues. *Prog Neurobiol.*  
84 1998 Dec;56(6):613–72.
- 85 14. Ninkovic J, Folchert A, Makhankov YV, Neuhaus SCF, Sillaber I, Straehle U, et al.  
86 Genetic identification of AChE as a positive modulator of addiction to the  
87 psychostimulant D-amphetamine in zebrafish. *Journal of Neurobiology.* 2006  
88 Apr;66(5):463–75.
- 89 15. Ackerman KM, Nakkula R, Zirger JM, Beattie CE, Boyd RT. Cloning and  
90 spatiotemporal expression of zebrafish neuronal nicotinic acetylcholine receptor alpha 6  
91 and alpha 4 subunit RNAs. *Dev Dyn.* 2009 Apr;238(4):980–92.
- 92 16. Zirger JM, Beattie CE, McKay DB, Thomas Boyd R. Cloning and expression of  
93 zebrafish neuronal nicotinic acetylcholine receptors. *Gene Expression Patterns.* 2003  
94 Dec 1;3(6):747–54.
- 95 17. Papke RL, Ono F, Stokes C, Urban J, Boyd RT. The nicotinic acetylcholine receptors of  
96 zebrafish and an evaluation of pharmacological tools used for their study. *Biochem*  
97 *Pharmacol.* 2012 Aug 1;84(3):352–65.
- 98 18. Ponzoni L, Braidà D, Pucci L, Andrea D, Fasoli F, Manfredi I, et al. The cytosine  
99 derivatives, CC4 and CC26, reduce nicotine-induced conditioned place preference in  
100 zebrafish by acting on heteromeric neuronal nicotinic acetylcholine receptors.  
101 *Psychopharmacology (Berl).* 2014 Dec;231(24):4681–93.
- 102 19. Kily LJM, Cowe YCM, Hussain O, Patel S, McElwaine S, Cotter FE, et al. Gene  
103 expression changes in a zebrafish model of drug dependency suggest conservation of  
104 neuro-adaptation pathways. *J Exp Biol.* 2008 May;211(Pt 10):1623–34.
- 105 20. Brock AJ, Goody SMG, Mead AN, Sudwarts A, Parker MO, Brennan CH. Assessing  
106 the Value of the Zebrafish Conditioned Place Preference Model for Predicting Human  
107 Abuse Potential. *J Pharmacol Exp Ther.* 2017 Oct;363(1):66–79.
- 108 21. Kedikian X, Faillace MP, Bernabeu R. Behavioral and Molecular Analysis of Nicotine-  
109 Conditioned Place Preference in Zebrafish. *PLOS ONE.* 2013 Jul 24;8(7):e69453.
- 110 22. Loeber S, Croissant B, Nakovics H, Zimmer A, Georgi A, Klein S, et al. The startle  
111 reflex in alcohol-dependent patients: changes after cognitive-behavioral therapy and  
112 predictive validity for drinking behavior. A pilot study. *Psychother Psychosom.*  
113 2007;76(6):385–90.
- 114 23. Vrana SR, Calhoun PS, Dennis MF, Kirby AC, Beckham JC. Acoustic startle and  
115 prepulse inhibition predict smoking lapse in posttraumatic stress disorder. *J*  
116 *Psychopharmacol.* 2015 Oct 1;29(10):1070–6.
- 117 24. Kumari V, Gray JA. Smoking withdrawal, nicotine dependence and prepulse inhibition  
118 of the acoustic startle reflex. *Psychopharmacology.* 1999 Jan 1;141(1):11–5.
- 119 25. Hall BJ, Slade S, Wells C, Rose JE, Levin ED. Bupropion–varenicline interactions and  
120 nicotine self-administration behavior in rats. *Pharmacology Biochemistry and Behavior.*  
121 2015 Mar 1;130:84–9.

- 122 26. O'Connor EC, Parker D, Rollema H, Mead AN. The  $\alpha 4\beta 2$  nicotinic acetylcholine-  
123 receptor partial agonist varenicline inhibits both nicotine self-administration following  
124 repeated dosing and reinstatement of nicotine seeking in rats. *Psychopharmacology*.  
125 2010 Feb 1;208(3):365–76.
- 126 27. Le Foll B, Chakraborty-Chatterjee M, Lev-Ran S, Barnes C, Pushparaj A, Gamaledin  
127 I, et al. Varenicline decreases nicotine self-administration and cue-induced  
128 reinstatement of nicotine-seeking behaviour in rats when a long pretreatment time is  
129 used. *Int J Neuropsychopharmacol*. 2012 Oct 1;15(9):1265–74.
- 130 28. Brennan CH, Parmar A, Kily LKM, Ananthathevan A, Doshi A, Patel S. Conditioned  
131 Place Preference Models of Drug Dependence and Relapse to Drug Seeking: Studies  
132 with Nicotine and Ethanol. In: Kalueff AV, Cachat JM, editors. *Zebrafish Models in*  
133 *Neurobehavioral Research* [Internet]. Totowa, NJ: Humana Press; 2011 [cited 2019 Apr  
134 29]. p. 163–79. (Neuromethods). Available from: [https://doi.org/10.1007/978-1-60761-](https://doi.org/10.1007/978-1-60761-922-2_7)  
135 [922-2\\_7](https://doi.org/10.1007/978-1-60761-922-2_7)
- 136 29. Kettleborough RNW, Busch-Nentwich EM, Harvey SA, Dooley CM, Bruijn E de,  
137 Eeden F van, et al. A systematic genome-wide analysis of zebrafish protein-coding gene  
138 function. *Nature*. 2013 Apr;496(7446):494–7.
- 139 30. Brose K, Bland KS, Wang KH, Arnott D, Henzel W, Goodman CS, et al. Slit Proteins  
140 Bind Robo Receptors and Have an Evolutionarily Conserved Role in Repulsive Axon  
141 Guidance. *Cell*. 1999 Mar 19;96(6):795–806.
- 142 31. Smidt MP, Burbach JPH. How to make a mesodiencephalic dopaminergic neuron. *Nat*  
143 *Rev Neurosci*. 2007 Jan;8(1):21–32.
- 144 32. Miyasaka N, Sato Y, Yeo S-Y, Hutson LD, Chien C-B, Okamoto H, et al. Robo2 is  
145 required for establishment of a precise glomerular map in the zebrafish olfactory  
146 system. *Development*. 2005 Mar 15;132(6):1283–93.
- 147 33. Turner KJ, Hoyle J, Valdivia LE, Cervený KL, Hart W, Mangoli M, et al. Abrogation of  
148 Stem Loop Binding Protein (Slbp) function leads to a failure of cells to transition from  
149 proliferation to differentiation, retinal coloboma and midline axon guidance deficits.  
150 *PLOS ONE*. 2019 Jan 29;14(1):e0211073.
- 151 34. Quednow BB, Wagner M, Westheide J, Beckmann K, Bliesener N, Maier W, et al.  
152 Sensorimotor gating and habituation of the startle response in schizophrenic patients  
153 randomly treated with amisulpride or olanzapine. *Biol Psychiatry*. 2006 Mar  
154 15;59(6):536–45.
- 155 35. Rankin CH, Abrams T, Barry RJ, Bhatnagar S, Clayton D, Colombo J, et al. Habituation  
156 Revisited: An Updated and Revised Description of the Behavioral Characteristics of  
157 Habituation. *Neurobiol Learn Mem*. 2009 Sep;92(2):135–8.
- 158 36. Kaprio J. Twin Studies in Finland 2006. *Twin Research and Human Genetics*. 2006  
159 Dec;9(6):772–7.
- 160 37. Lawson ND, Wolfe SA. Forward and Reverse Genetic Approaches for the Analysis of  
161 Vertebrate Development in the Zebrafish. *Developmental Cell*. 2011 Jul 19;21(1):48–  
162 64.

- 163 38. Morlot C, Thielens NM, Ravelli RBG, Hemrika W, Romijn RA, Gros P, et al. Structural  
164 insights into the Slit-Robo complex. *PNAS*. 2007 Sep 18;104(38):14923–8.
- 165 39. Blockus H, Chédotal A. The multifaceted roles of Slits and Robos in cortical circuits:  
166 from proliferation to axon guidance and neurological diseases. *Current Opinion in*  
167 *Neurobiology*. 2014 Aug 1;27:82–8.
- 168 40. Marillat V, Cases O, Nguyenf□Ba□Charvet KT, Tessier□Lavigne M, Sotelo C,  
169 Chédotal A. Spatiotemporal expression patterns of slit and robo genes in the rat brain.  
170 *Journal of Comparative Neurology*. 2002 Jan 7;442(2):130–55.
- 171 41. Yuan W, Rao Y, Babiuk RP, Greer J, Wu JY, Ornitz DM. A genetic model for a central  
172 (septum transversum) congenital diaphragmatic hernia in mice lacking Slit3. *PNAS*.  
173 2003 Apr 29;100(9):5217–22.
- 174 42. Liu J, Zhang L, Wang D, Shen H, Jiang M, Mei P, et al. Congenital diaphragmatic  
175 hernia, kidney agenesis and cardiac defects associated with Slit3-deficiency in mice.  
176 *Mechanisms of Development*. 2003 Sep 1;120(9):1059–70.
- 177 43. Long H, Sabatier C, Le Ma, Plump A, Yuan W, Ornitz DM, et al. Conserved Roles for  
178 Slit and Robo Proteins in Midline Commissural Axon Guidance. *Neuron*. 2004 Apr  
179 22;42(2):213–23.
- 180 44. Halberstadt AL, Geyer MA. Habituation and sensitization of acoustic startle: opposite  
181 influences of dopamine D1 and D2-family receptors. *Neurobiol Learn Mem*. 2009  
182 Sep;92(2):243–8.
- 183 45. Burgess HA, Granato M. Sensorimotor gating in larval zebrafish. *J Neurosci*. 2007 May  
184 2;27(18):4984–94.
- 185 46. Fletcher PJ, Lê AD, Higgins GA. Serotonin receptors as potential targets for modulation  
186 of nicotine use and dependence. In: Di Giovanni G, Di Matteo V, Esposito E, editors.  
187 *Progress in Brain Research* [Internet]. Elsevier; 2008 [cited 2019 Jul 16]. p. 361–83.  
188 (Serotonin–Dopamine Interaction: Experimental Evidence and Therapeutic Relevance;  
189 vol. 172). Available from:  
190 <http://www.sciencedirect.com/science/article/pii/S0079612308009187>
- 191 47. Olausson P, Engel JA, Söderpalm B. Involvement of serotonin in nicotine dependence:  
192 Processes relevant to positive and negative regulation of drug intake. *Pharmacology*  
193 *Biochemistry and Behavior*. 2002 Apr 1;71(4):757–71.
- 194 48. Roberts DCS, Loh EA, Baker GB, Vickers G. Lesions of central serotonin systems  
195 affect responding on a progressive ratio schedule reinforced either by intravenous  
196 cocaine or by food. *Pharmacology Biochemistry and Behavior*. 1994 Sep 1;49(1):177–  
197 82.
- 198 49. LeMarquand D, Pihl RO, Benkelfat C. Serotonin and alcohol intake, abuse, and  
199 dependence: Findings of animal studies. *Biological Psychiatry*. 1994 Sep 15;36(6):395–  
200 421.
- 201 50. Opitz K, Weischer ML. Volitional oral intake of nicotine in tupaia: drug-induced  
202 alterations. *Drug Alcohol Depend*. 1988 May;21(2):99–104.

- 203 51. Seth P, Cheeta S, Tucci S, File SE. Nicotinic-serotonergic interactions in brain and  
204 behaviour. *Pharmacology Biochemistry and Behavior*. 2002 Apr 1;71(4):795–805.
- 205 52. Rasmussen K, Kallman MJ, Helton DR. Serotonin-1A antagonists attenuate the effects  
206 of nicotine withdrawal on the auditory startle response. *Synapse*. 1997 Oct;27(2):145–  
207 52.
- 208 53. Rasmussen K, Calligaro DO, Czachura JF, Dreshfield-Ahmad LJ, Evans DC, Hemrick-  
209 Luecke SK, et al. The novel 5-Hydroxytryptamine(1A) antagonist LY426965: effects on  
210 nicotine withdrawal and interactions with fluoxetine. *J Pharmacol Exp Ther*. 2000  
211 Aug;294(2):688–700.
- 212 54. Harrison AA, Liem YT, Markou A. Fluoxetine combined with a serotonin-1A receptor  
213 antagonist reversed reward deficits observed during nicotine and amphetamine  
214 withdrawal in rats. *Neuropsychopharmacology*. 2001 Jul;25(1):55–71.
- 215 55. Dao JM, McQuown SC, Loughlin SE, Belluzzi JD, Leslie FM. Nicotine alters limbic  
216 function in adolescent rat by a 5-HT1A receptor mechanism.  
217 *Neuropsychopharmacology*. 2011 Jun;36(7):1319–31.
- 218 56. Švob Štrac D, Pivac N, Mück-Šeler D. The serotonergic system and cognitive function.  
219 *Transl Neurosci*. 2016 May 9;7(1):35–49.
- 220 57. Carrard A, Salzmann A, Malafosse A, Karege F. Increased DNA methylation status of  
221 the serotonin receptor 5HTR1A gene promoter in schizophrenia and bipolar disorder. *J*  
222 *Affect Disord*. 2011 Aug;132(3):450–3.
- 223 58. Shi Y, Zhao X, Yu L, Tao R, Tang J, La Y, et al. Genetic structure adds power to detect  
224 schizophrenia susceptibility at SLIT3 in the Chinese Han population. *Genome Res*.  
225 2004 Jul;14(7):1345–9.
- 226 59. Parker MO, Evans AM-D, Brock AJ, Combe FJ, Teh M-T, Brennan CH. Moderate  
227 alcohol exposure during early brain development increases stimulus-response habits in  
228 adulthood. *Addict Biol*. 2016 Jan;21(1):49–60.
- 229 60. Cohen J. A power primer. *Psychol Bull*. 1992 Jul;112(1):155–9.
- 230 61. Hamajima N, Saito T, Matsuo K, Kozaki K, Takahashi T, Tajima K. Polymerase chain  
231 reaction with confronting two-pair primers for polymorphism genotyping. *Jpn J Cancer*  
232 *Res*. 2000 Sep;91(9):865–8.
- 233 62. Driever W, Rath M, Nitschke R, Filippi A, Ronneberger O, Driever W. Generation of  
234 high quality multi-view confocal 3D datasets of zebrafish larval brains suitable for  
235 analysis using Virtual Brain Explorer (ViBE-Z) software. *Protocol Exchange [Internet]*.  
236 2012 Jun 22 [cited 2018 Apr 26]; Available from:  
237 <http://www.nature.com/protocolexchange/protocols/2408>
- 238 63. Tran S, Nowicki M, Muraleetharan A, Gerlai R. Differential effects of dopamine D1 and  
239 D 2/3 receptor antagonism on motor responses. *Psychopharmacology (Berl)*. 2015  
240 Feb;232(4):795–806.

- 241 64. Perrault G, Depoortere R, Morel E, Sanger DJ, Scatton B. Psychopharmacological  
242 profile of amisulpride: an antipsychotic drug with presynaptic D2/D3 dopamine receptor  
243 antagonist activity and limbic selectivity. *J Pharmacol Exp Ther*. 1997 Jan;280(1):73–  
244 82.
- 245 65. Schoemaker H, Claustre Y, Fage D, Rouquier L, Chergui K, Curet O, et al.  
246 Neurochemical characteristics of amisulpride, an atypical dopamine D2/D3 receptor  
247 antagonist with both presynaptic and limbic selectivity. *J Pharmacol Exp Ther*. 1997  
248 Jan;280(1):83–97.
- 249 66. Brennan MOP and CH. Translational Pharmacology of a Putative Measure of Motor  
250 Impulsivity in Larval Zebrafish [Internet]. *Current Psychopharmacology*. 2016 [cited  
251 2018 Apr 26]. Available from: <http://www.eurekaselect.com/142514/article>
- 252 67. Tang R, Dodd A, Lai D, McNabb WC, Love DR. Validation of zebrafish (*Danio rerio*)  
253 reference genes for quantitative real-time RT-PCR normalization. *Acta Biochim  
254 Biophys Sin (Shanghai)*. 2007 May;39(5):384–90.
- 255 68. Collier AD, Echevarria DJ. The utility of the zebrafish model in conditioned place  
256 preference to assess the rewarding effects of drugs. *Behavioural Pharmacology*. 2013  
257 Sep;24(5 and 6):375.
- 258 69. Martineau AR, James WY, Hooper RL, Barnes NC, Jolliffe DA, Greiller CL, et al.  
259 Vitamin D3 supplementation in patients with chronic obstructive pulmonary disease  
260 (ViDiCO): a multicentre, double-blind, randomised controlled trial. *Lancet Respir Med*.  
261 2015 Feb;3(2):120–30.
- 262 70. Martineau AR, MacLaughlin BD, Hooper RL, Barnes NC, Jolliffe DA, Greiller CL, et  
263 al. Double-blind randomised placebo-controlled trial of bolus-dose vitamin D3  
264 supplementation in adults with asthma (ViDiAs). *Thorax*. 2015 May;70(5):451–7.
- 265 71. Martineau AR, Hanifa Y, Witt KD, Barnes NC, Hooper RL, Patel M, et al. Double-blind  
266 randomised controlled trial of vitamin D3 supplementation for the prevention of acute  
267 respiratory infection in older adults and their carers (ViDiFlu). *Thorax*. 2015  
268 Oct;70(10):953–60.
- 269 72. Loukola A, Wedenoja J, Keskitalo-Vuokko K, Broms U, Korhonen T, Ripatti S, et al.  
270 Genome-wide association study on detailed profiles of smoking behavior and nicotine  
271 dependence in a twin sample. *Mol Psychiatry*. 2014 May;19(5):615–24.
- 272 73. Loukola A, Broms U, Maunu H, Widén E, Heikkilä K, Siivola M, et al. Linkage of  
273 nicotine dependence and smoking behavior on 10q, 7q and 11p in twins with  
274 homogeneous genetic background. *Pharmacogenomics J*. 2008 Jun;8(3):209–19.
- 275 74. Broms U, Wedenoja J, Largeau MR, Korhonen T, Pitkäniemi J, Keskitalo-Vuokko K, et  
276 al. Analysis of detailed phenotype profiles reveals CHRNA5-CHRNA3-CHRNA4 gene  
277 cluster association with several nicotine dependence traits. *Nicotine Tob Res*. 2012  
278 Jun;14(6):720–33.
- 279 75. Miller SA, Dykes DD, Polesky HF. A simple salting out procedure for extracting DNA  
280 from human nucleated cells. *Nucleic Acids Res*. 1988 Feb 11;16(3):1215.

- 281 76. Purcell S, Neale B, Todd-Brown K, Thomas L, Ferreira MAR, Bender D, et al. PLINK:  
282 a tool set for whole-genome association and population-based linkage analyses. *Am J*  
283 *Hum Genet.* 2007 Sep;81(3):559–75.
- 284 77. Zhou X, Stephens M. Genome-wide Efficient Mixed Model Analysis for Association  
285 *Studies.* *Nat Genet.* 2012 Jun 17;44(7):821–4.
- 286
